# Supplementary material for: Feature Fusion of ICP-AES, UV-Vis and FT-MIR for Origin Traceability of Boletus edulis Mushrooms in Combination with Chemometrics
Source: PubMed Central journal article supplement (PMC5795700; doi:10.3390/s18010241), 2018-01-15
Supplement: sensors-18-00241-s001.pdf [file sensors-18-00241-s001.pdf]

Article

# Feature Fusion of ICP-AES, UV-Vis and FT-MIR for Origin Traceability of *Boletus Edulis* Mushrooms in Combination with Chemometrics

Luming Qi <sup>1,2</sup>, Honggao Liu <sup>3</sup>, Jieqing Li <sup>3</sup>, Tao Li <sup>4,\*</sup> and Yuanzhong Wang <sup>1,\*</sup>

<sup>1</sup> Institute of Medicinal Plants, Yunnan Academy of Agricultural Sciences, Kunming 650200, China; 18669326801@163.com

<sup>2</sup> State Key Laboratory Breeding Base of Systematic Research, Development and Utilization of Chinese Medicine Resources, Chengdu University of Traditional Chinese Medicine, Chengdu 611137, China

<sup>3</sup> College of Agronomy and Biotechnology, Yunnan Agricultural University, Kunming 650201, China; honggaoliu@126.com (H.L.); lijieqing2008@126.com (J.L.)

<sup>4</sup> College of Resources and Environment, Yuxi Normal University, Yuxi 653100, China

\* Correspondence: ltyx\_1976@126.com (T.L.); boletus@126.com (Y.W.)

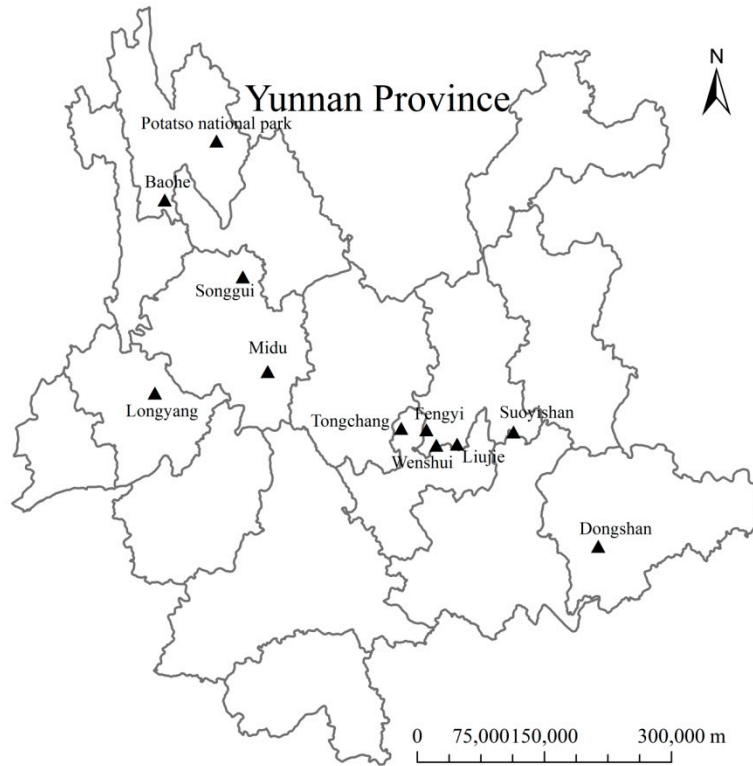

Figure S1: Eleven microhabitats of *Boletus edulis* in Yunnan Province

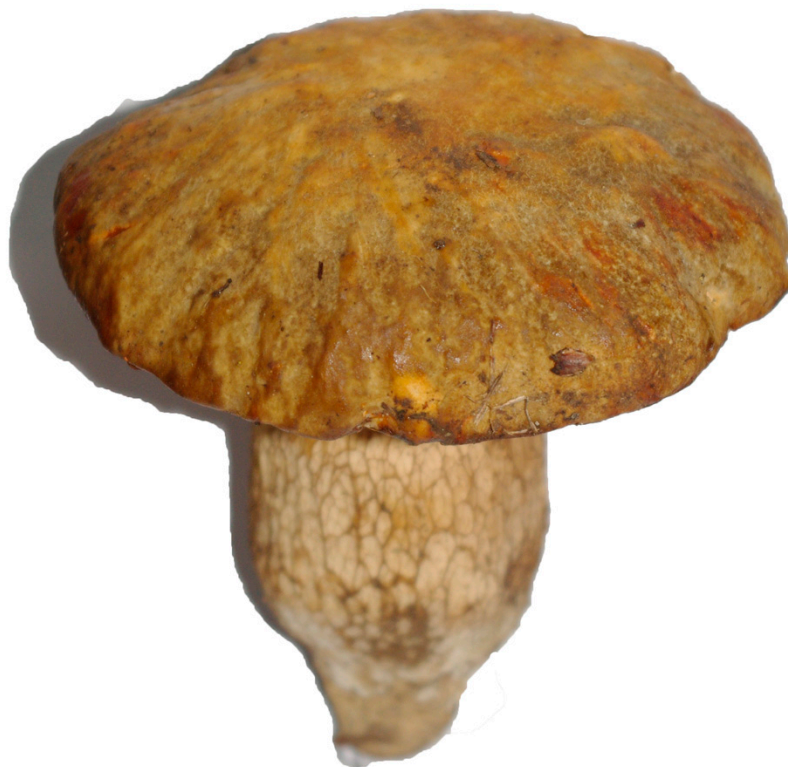

Figure S2: The real product of *Boletus edulis*

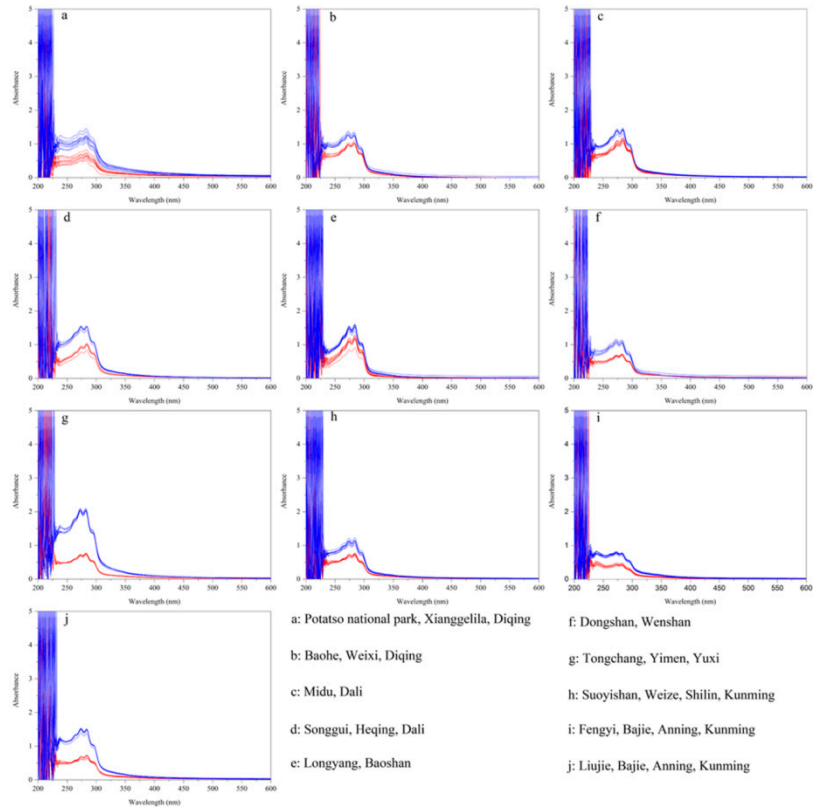

Figure S3: The UV-Vis fingerprints of mushroom chloroform extract from other ten geographical origins

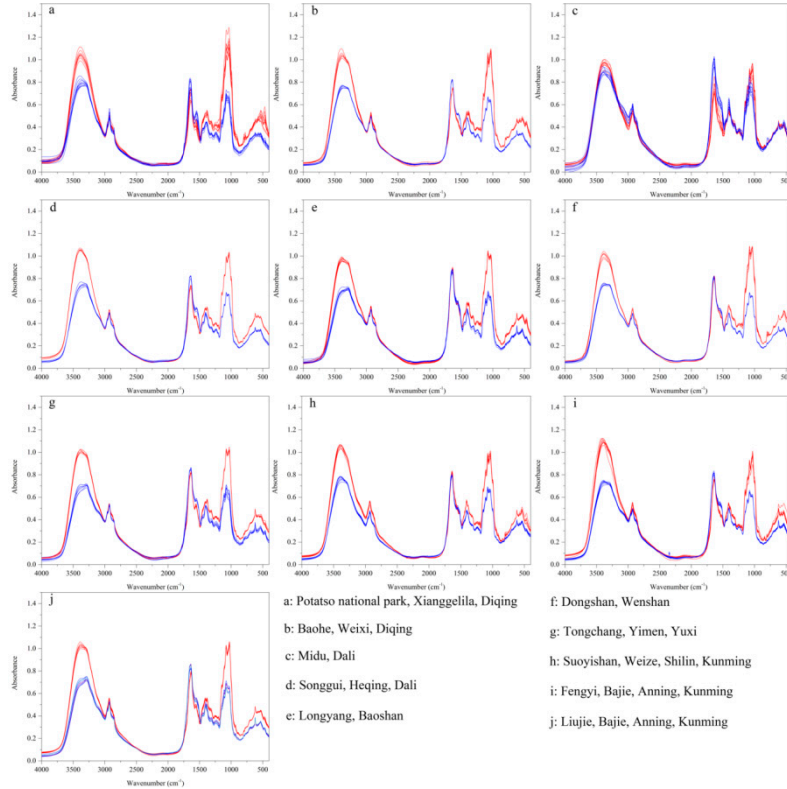

Figure S4: The FT-MIR fingerprints of the mushroom samples from other ten geographical origins

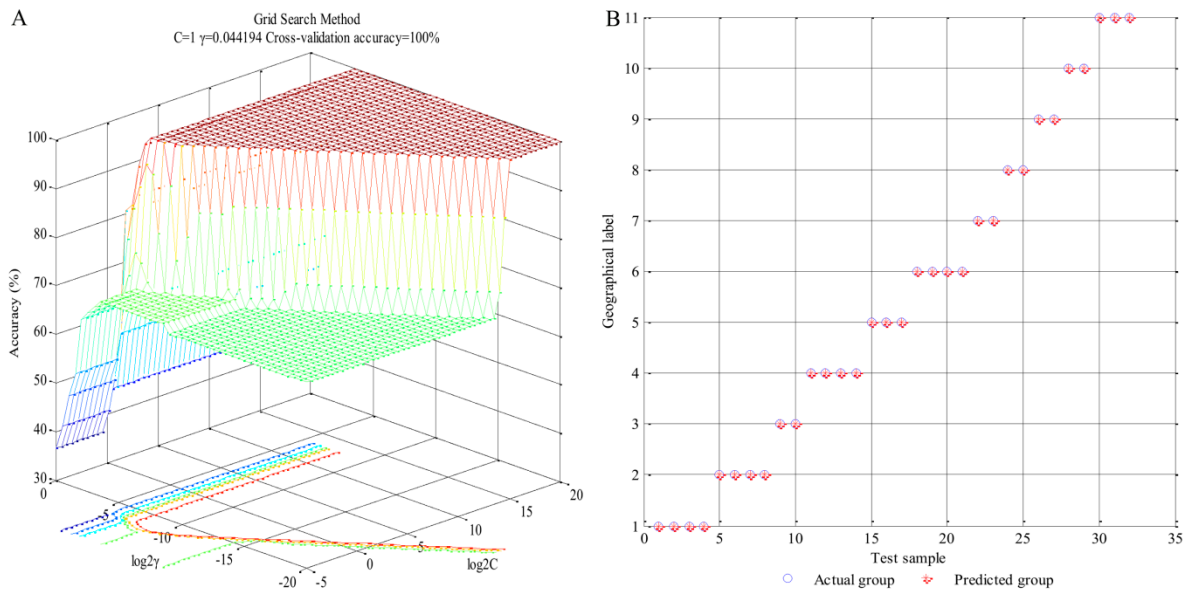

**Figure S5: Score plots of the GS-SVM model of mushroom cap**

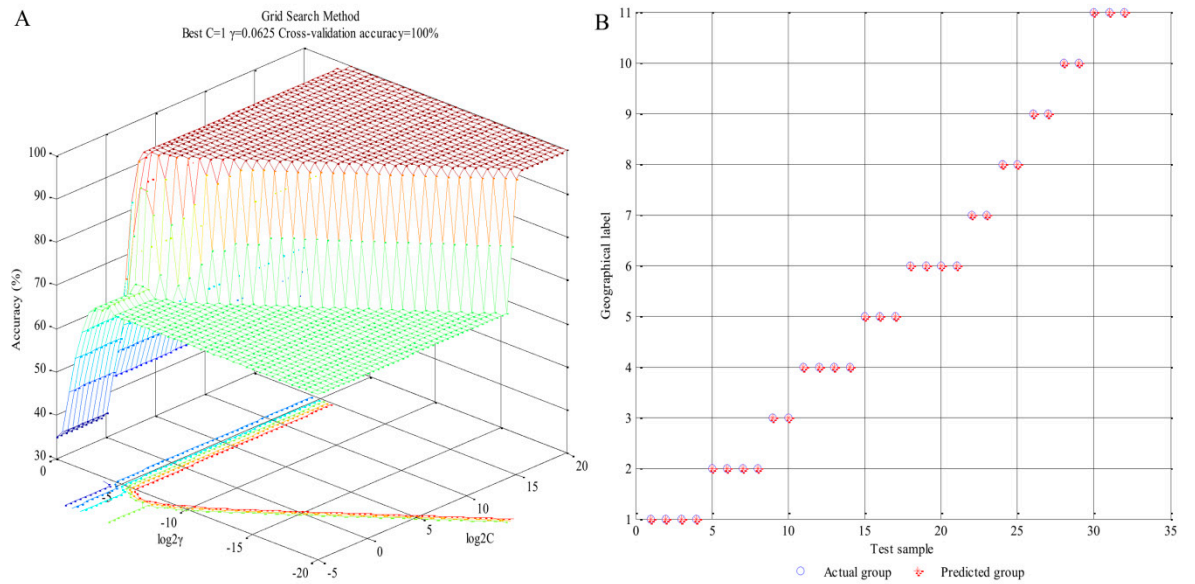

**Figure S6: Score plots of the GS-SVM model of mushroom stipe**
